# Supplementary material for: Cardiac miR-133a overexpression prevents early cardiac fibrosis in diabetes
Source: PubMed Central journal article supplement (PMC3955148; doi:10.1111/jcmm.12218), 2014-01-16

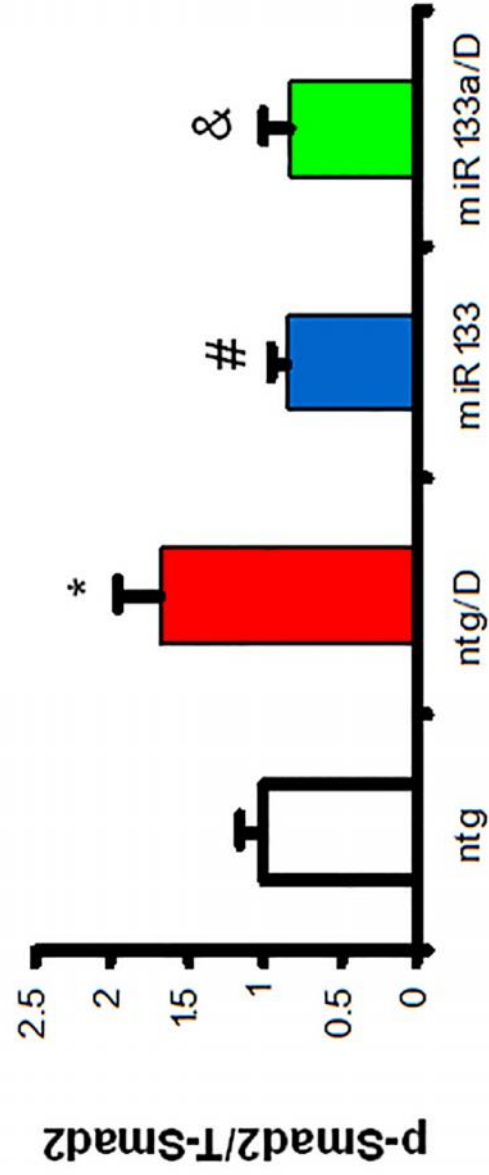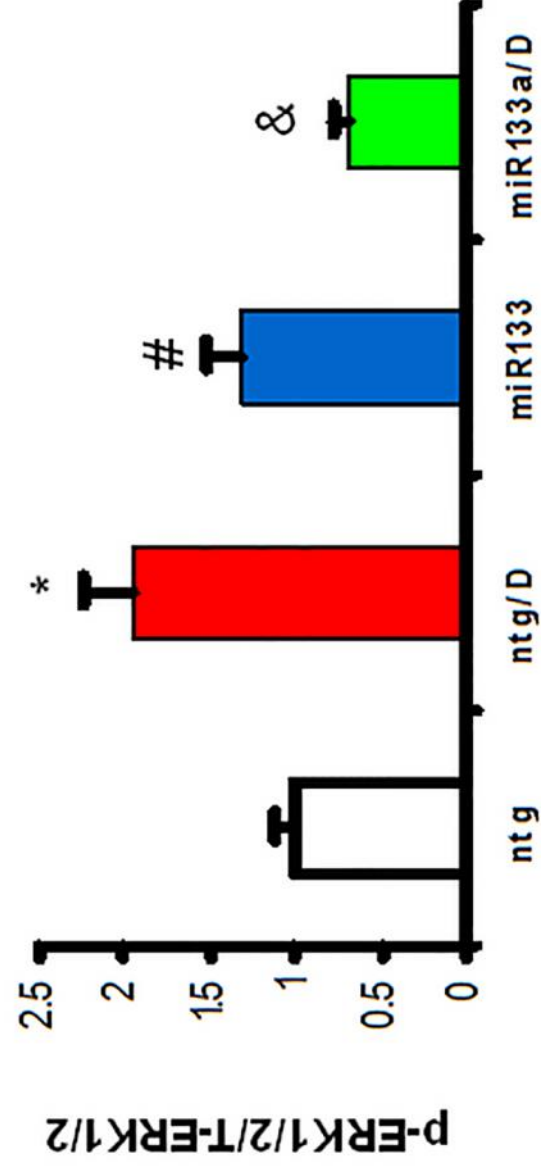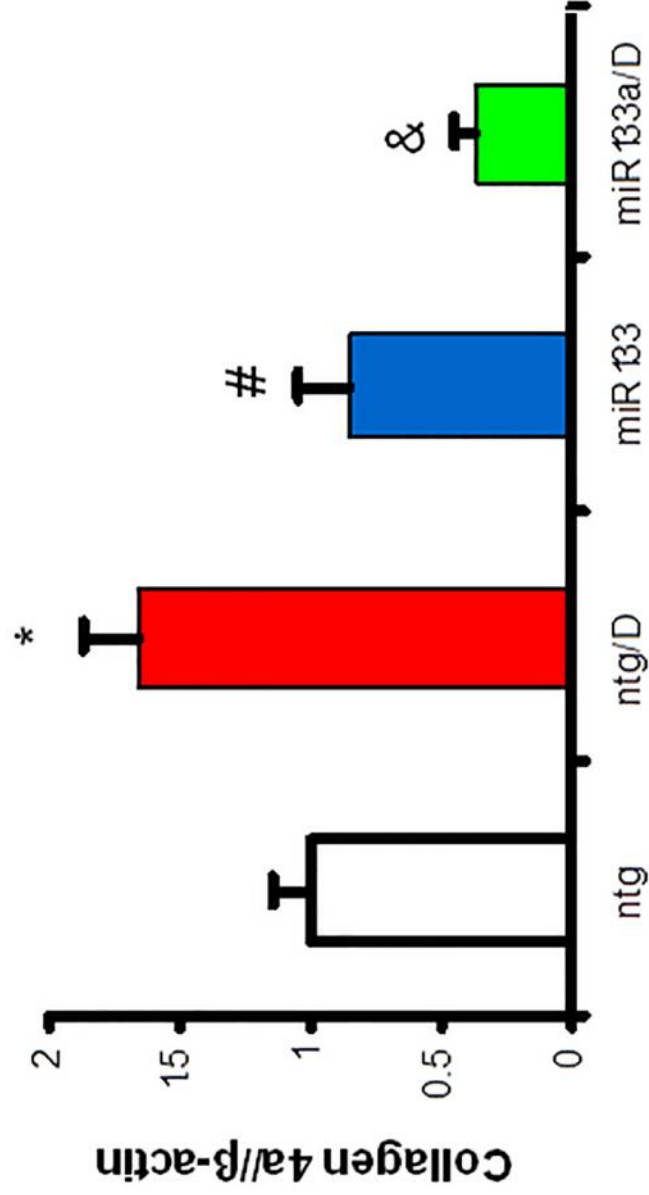

Supplement: jcmm0018-0415-sd1.pdf [file jcmm0018-0415-sd1.pdf]
